# Supplementary material for: Virtual Reality Interventions for Needle-Related Procedural Pain, Fear and Anxiety—A Systematic Review and Meta-Analysis
Source: MDPI journal article supplement (doi:10.3390/jcm10153248), 2021-07-23
Supplement: s1 [file s1]

## ASSESSMENT OF RISK OF BIAS OF THE INCLUDED STUDIES

### 1. Caruso et al. 2019

| Bias                                            | Authors' judgement                                                                             | Support for judgement                                                                                         |
|-------------------------------------------------|------------------------------------------------------------------------------------------------|---------------------------------------------------------------------------------------------------------------|
| Random sequence generation (selection bias)     | Low risk      | Random number generator                                                                                       |
| Allocation concealment (selection bias)         | Low risk      | Allocation generator                                                                                          |
| Blinding of outcome assessment (detection bias) | Unclear risk  | No information about blinding assessor.                                                                       |
| Incomplete outcome data (attrition bias)        | High risk     | 31 participants were excluded from analysis due to missing primary outcome data.                              |
| Selective reporting (reporting bias)            | Low risk      | The study protocol is not available but it is clear that the published reports include all expected outcomes. |

### 2. Dumulin et al. 2019

| Bias                                            | Authors' judgement                                                                               | Support for judgement                                                                                         |
|-------------------------------------------------|--------------------------------------------------------------------------------------------------|---------------------------------------------------------------------------------------------------------------|
| Random sequence generation (selection bias)     | Low risk      | Random numbers table                                                                                          |
| Allocation concealment (selection bias)         | Unclear risk  | No information                                                                                                |
| Blinding of outcome assessment (detection bias) | Unclear risk  | No information about blinding assessor.                                                                       |
| Incomplete outcome data (attrition bias)        | Low risk      | No missing outcome data                                                                                       |
| Selective reporting (reporting bias)            | Low risk      | The study protocol is not available but it is clear that the published reports include all expected outcomes. |

### 3. Gerçeker et al. 2020

| Bias                                            | Authors' judgement                                                                               | Support for judgement                                                                      |
|-------------------------------------------------|--------------------------------------------------------------------------------------------------|--------------------------------------------------------------------------------------------|
| Random sequence generation (selection bias)     | Low risk      | Computer generated number table                                                            |
| Allocation concealment (selection bias)         | Low risk      | Allocation generator                                                                       |
| Blinding of outcome assessment (detection bias) | Unclear risk  | The blindig of outcome assessor is unclear described                                       |
| Incomplete outcome data (attrition bias)        | Low risk      | 5 participants were excluded from analysis due to removing vr glasses during intervention. |
| Selective reporting (reporting bias)            | Low risk      | The study protocol is available. The published reports include all expected outcomes       |

#### 4. Gerçeker et al. 2021

| Bias                                            | Authors' judgement                                                                          | Support for judgement                                                                         |
|-------------------------------------------------|---------------------------------------------------------------------------------------------|-----------------------------------------------------------------------------------------------|
| Random sequence generation (selection bias)     | Low risk   | Randomization was performed with a computerized random-number generator                       |
| Allocation concealment (selection bias)         | High risk  | The allocation was based on gender and group age                                              |
| Blinding of outcome assessment (detection bias) | Low risk   | Data analyst was blinded                                                                      |
| Incomplete outcome data (attrition bias)        | Low risk   | 3 participants were excluded from analysis due to the port needle insertion procedure failure |
| Selective reporting (reporting bias)            | Low risk   | The study protocol is available. The published reports include all expected outcomes          |

#### 5. Gold et al. 2006

| Bias                                            | Authors' judgement                                                                               | Support for judgement                                                |
|-------------------------------------------------|--------------------------------------------------------------------------------------------------|----------------------------------------------------------------------|
| Random sequence generation (selection bias)     | Unclear risk    | No information about randomization tool.                             |
| Allocation concealment (selection bias)         | Unclear risk  | No information about allocation tool.                                |
| Blinding of outcome assessment (detection bias) | Unclear risk  | No information.                                                      |
| Incomplete outcome data (attrition bias)        | Low risk      | No missing outcomes.                                                 |
| Selective reporting (reporting bias)            | Low risk      | All of the study's pre-specified primary outcomes have been reported |

#### 6. Semerci et al. 2020

| Bias                                            | Authors' judgement                                                                            | Support for judgement                                                                                                                                                    |
|-------------------------------------------------|-----------------------------------------------------------------------------------------------|--------------------------------------------------------------------------------------------------------------------------------------------------------------------------|
| Random sequence generation (selection bias)     | Low risk   | blocked randomization                                                                                                                                                    |
| Allocation concealment (selection bias)         | Low risk   | The allocation concealment through a computer-generated number table                                                                                                     |
| Blinding of outcome assessment (detection bias) | High risk  | The study was not blind;                                                                                                                                                 |
| Incomplete outcome data (attrition bias)        | Low risk   | 1 participant from control group was excluded from analysis due to incomplete data<br>2 participants from VR group was excluded from analysis due to removing VR glasses |
| Selective reporting (reporting bias)            | Low risk   | The study protocol is available. The published reports include all expected outcomes                                                                                     |

#### 7. Wint et al. 2002

| Bias                                            | Authors' judgement                                                                             | Support for judgement                                                |
|-------------------------------------------------|------------------------------------------------------------------------------------------------|----------------------------------------------------------------------|
| Random sequence generation (selection bias)     | Unclear risk  | No information                                                       |
| Allocation concealment (selection bias)         | Unclear risk  | No information                                                       |
| Blinding of outcome assessment (detection bias) | Unclear risk  | No information about blinding assessor                               |
| Incomplete outcome data (attrition bias)        | Low risk      | No missing outcome data                                              |
| Selective reporting (reporting bias)            | Low risk      | All of the study's pre-specified primary outcomes have been reported |
